# Supplementary material
Source: PubMed Central journal article supplement (PMC3259879)
Supplement: M805682200_1.pdf [file M805682200_1.pdf]

| position | <sup>1</sup> H-NMR | <sup>13</sup> C-NMR | integral |
|----------|--------------------|---------------------|----------|
| 1        | .....              | 132.1               | .....    |
| 2        | 6.634 d 2          | 116.9               | 1H       |
| 3        | .....              | 146.2               | .....    |
| 4        | .....              | 144.8               | .....    |
| 5        | 6.669 d 8          | 116.5               | 1H       |
| 6        | 6.514 dd 8 2       | 121.1               | 1H       |
| 7        | 2.611 t 7          | 40.4                | 2H       |
| 8        | 3.333 m            | 42.4                | 2H       |
| 9        | .....              | 174.7               | .....    |
| 10       | 2.541 t 7          | 31.1                | 2H       |
| 11       | 2.421 t 7          | 32.0                | 2H       |
| 12       | .....              | 177.0               | .....    |

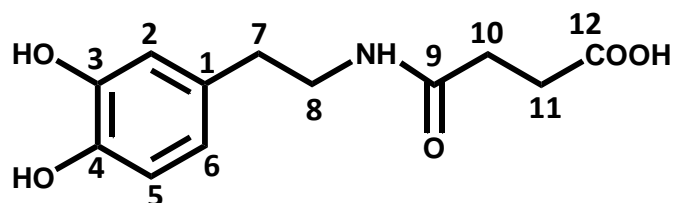

**Fig. S1.** <sup>1</sup>H-NMR and <sup>13</sup>C-NMR assignments for SUD

| position | <sup>1</sup> H-NMR | <sup>13</sup> C-NMR | integral |
|----------|--------------------|---------------------|----------|
| 1        | .....              | 132.1               | .....    |
| 2        | 6.628 d 2          | 116.9               | 1H       |
| 3        | .....              | 146.2               | .....    |
| 4        | .....              | 144.8               | .....    |
| 5        | 6.668 d 8          | 116.3               | 1H       |
| 6        | 6.507 dd 8 2       | 121.0               | 1H       |
| 7        | 2.614 t 7          | 35.9                | 2H       |
| 8        | 3.334 m            | 42.3                | 2H       |
| 9        | .....              | 177.0               | .....    |
| 10       | 2.147 q 7.5        | 30.2                | 2H       |
| 11       | 1.086 t 7.5        | 10.5                | 3H       |

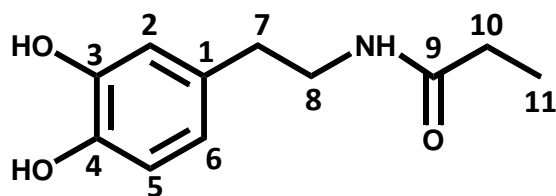

**Fig. S2.** <sup>1</sup>H-NMR and <sup>13</sup>C-NMR assignments for PRD

| position | <sup>1</sup> H-NMR | <sup>13</sup> C-NMR | integral |
|----------|--------------------|---------------------|----------|
| 1        | .....              | 132.0               | .....    |
| 2        | 6.629 d 2          | 116.8               | 1H       |
| 3        | .....              | 146.3               | .....    |
| 4        | .....              | 144.8               | .....    |
| 5        | 6.663 d 8          | 116.3               | 1H       |
| 6        | 6.506 dd 8 2       | 121.0               | 1H       |
| 7        | 2.617 t 7          | 36.0                | 2H       |
| 8        | 3.330 m            | 42.2                | 2H       |
| 9        | .....              | 176.3               | .....    |
| 10       | 2.125 t 7          | 37.1                | 2H       |
| 11       | 1.560 quintet 7    | 26.8                | 2H       |
| 12       | 1.285 } m          | 32.5                | 2H       |
| 13       |                    | 23.4                | 2H       |
| 14       | 0.892 t 7          | 14.3                | 3H       |

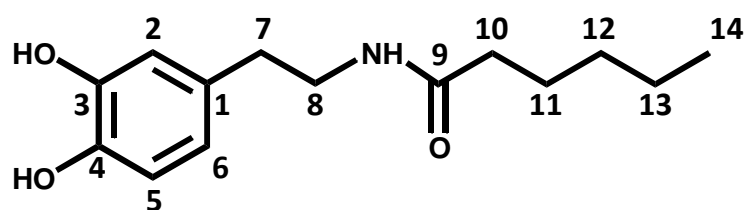

**Fig. S3.** <sup>1</sup>H-NMR and <sup>13</sup>C-NMR assignments for HED

| position | <sup>1</sup> H-NMR | <sup>13</sup> C-NMR | integral |
|----------|--------------------|---------------------|----------|
| 1        | .....              | 132.1               | .....    |
| 2        | 6.632 d 2          | 116.9               | 1H       |
| 3        | .....              | 146.3               | .....    |
| 4        | .....              | 144.8               | .....    |
| 5        | 6.668 d 8          | 116.4               | 1H       |
| 6        | 6.511 dd 8 2       | 121.0               | 1H       |
| 7        | 2.618 t 7.5        | 36.0                | 2H       |
| 8        | 3.329 m            | 42.3                | 2H       |
| 9        | .....              | 175.3               | .....    |
| 10       | 2.194 t 7          | 36.2                | 2H       |
| 11       | 1.851 quintet 7    | 22.4                | 2H       |
| 12       | 2.282 t 7          | 34.3                | 2H       |
| 13       | .....              | 177.1               | .....    |

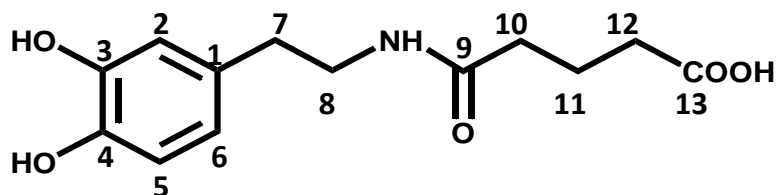

**Fig. S4.** <sup>1</sup>H-NMR and <sup>13</sup>C-NMR assignments for GLD

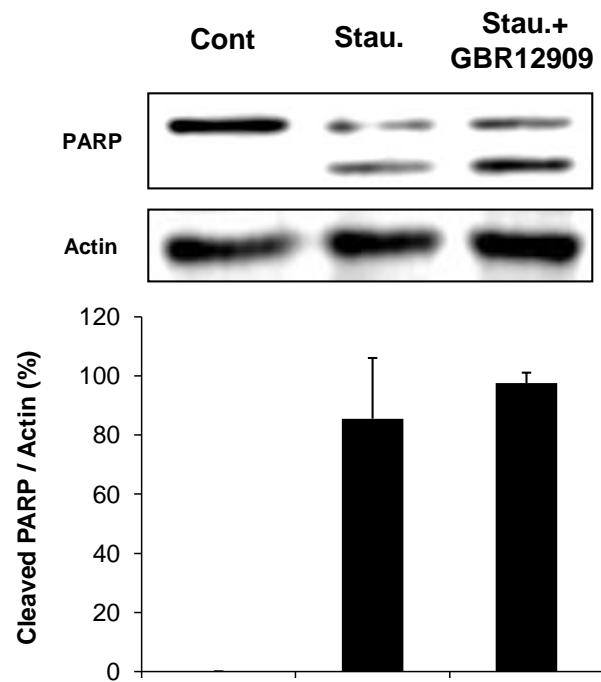

**Fig. S5. Effect of GBR12909 on staurosporine-induced PARP cleavage.** 1  $\mu$ M GBR12509 was administrated in SH-SY5Y cells for 30 min, then the cells were treated with 1  $\mu$ M sturosporine for 24 h. PARP cleavage was determined by western blot.
